# Supplementary material for: Synthesis and characterization of epitope-imprinted polymers for purification of human hemoglobin
Source: Royal Society of Chemistry journal article supplement (doi:10.1039/c7ra07674f), 2017-01-01
Supplement: c7ra07674f1.pdf [file c7ra07674f1.pdf]

*Electronic Supplementary Information*

## **Synthesis and characterization of epitope-imprinted polymers for purification of human hemoglobin**

Héctor Bagán,<sup>a</sup> Tongchang Zhou,<sup>a</sup> Nélide Leiva Eriksson,<sup>a,b</sup> Leif Bülow<sup>a</sup> and Lei Ye<sup>a,\*</sup>

<sup>a</sup> Division of Pure and Applied Biochemistry, Department of Chemistry, Lund University,

22100 Lund, Sweden

Email: [lei.ye@tbiokem.lth.se](mailto:lei.ye@tbiokem.lth.se); Tel +46 46 2229560; Fax +46 46 2224611

<sup>b</sup> School of Biological Sciences, University of Essex, Wivenhoe Park, Colchester, CO4 3SQ, UK

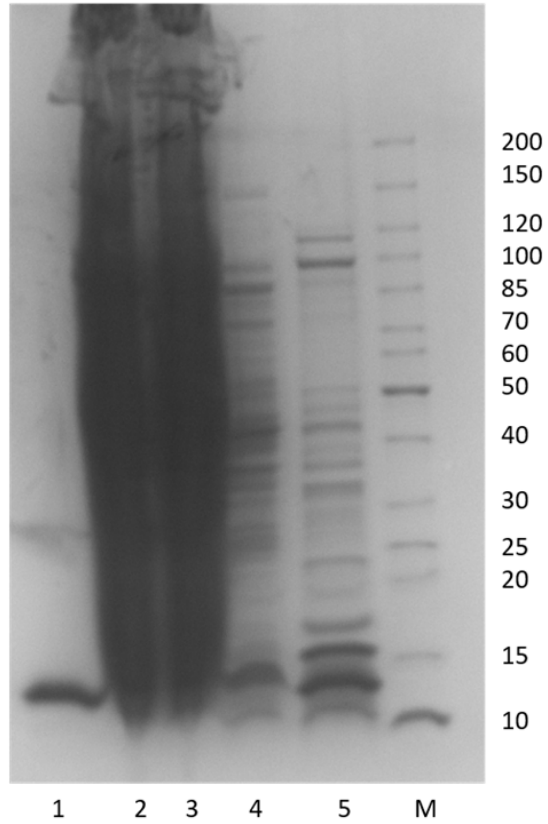

**Fig. S1** SDS-PAGE of the cell extract and protein solutions before and after treatment with the the MIP particles. Lane 1: HbF standard; Lane 2: crude cell extract; Lane 3: unbound fraction of the crude cell extract; Lane 4: crude cell extract washed from the polymer particles; Lane 5: protein solution eluted from the polymer particles.
